# Supplementary material for: Light-inducible protein degradation in E. coli with the LOVdeg tag
Source: eLife. 2024 Jan 25;12:RP87303. doi: 10.7554/eLife.87303 (PMC10945698; doi:10.7554/eLife.87303)
Supplement: Supplementary file 1. [file elife-87303-supp1.xlsx]

## Sheet: Sheet1
Plasmids used in this study
Plasmid	Origin	Operon	Resistance	Reference
pBbS5c-mCherry-AsLOV2(546)	SC101	PlacUV5-mCherry-AsLOV2(546)	CmR	This study
pBbS5c-mCherry-AsLOV2(543)	SC101	PlacUV5-mCherry-AsLOV2(543)	CmR	This study
pBbS5c-mCherry-AsLOV2*(546)	SC101	PlacUV5-mCherry-AsLOV2*(546)	CmR	This study
pBbS5c-mCherry-AsLOV2*(543) (LOVdeg)	SC101	PlacUV5-mCherry-AsLOV2*(543)	CmR	This study
pBbSW7c- mCherry-AsLOV2*(543)	SC101	Pconst.-mCherry- AsLOV2*(543)	CmR	This study
pBbA8k-ClpA	P15a	PBad-ClpA	KanR	This study
pBbA8k-HslUV
	P15a	Pbad-HslVU	KanR	This study
pBbS5c-LacI-LOVdeg-mCherry	SC101	Plac-LacI-LOVdeg, PlacUV5-mCherry	CmR	This study
pBbAa-LacI-decoy	P15a	LacI decoy	AmpR	(Wang et al., 2021)
pJF076Sk	SC101	PJ23117-mRFP1	KanR	This study
pJF093	P15a	PCas9-dCas9, Ptet-MCP-SoxS	CmR	(Dong et al., 2018)
pA1c-CRISPRa	P15a	PCas9-dCas9, Ptrc-MCP-SoxS	CmR	This study
pA1c-CRISPRa-LOVdeg	P15a	PCas9-dCas9, Ptrc-MCP-SoxS-LOVdeg	CmR	This study
pCD061-J106	ColE1	PJ23119-J106-scRNA	AmpR	(Dong et al., 2018)
pBbA5k-acrAB	P15a	PlacUV5-acrAB	KanR	(El Meouche and Dunlop, 2018)
pBbA5k-acrAB-LOVdeg	P15a	PlacUV5-acrAB-LOVdeg	KanR	This study
pBbS5c-mCherry-LOVdeg(V416I)	SC101	PlacUV5-mCherry-LOVdeg(V416I)	CmR	This study
pEL222	P15a	PrrnBp1-EL222	CmR	(Jayaraman et al., 2016)
pBbE5k-PEL222-mCherry-LOVdeg	ColE1	PEL222-mCherry-LOVdeg	KanR	This study, promoter from (Ding et al., 2020)
pBbS5c-CpFatB1*-LOVdeg	SC101	PlacUV5-CpFatB1.2-M4-287-LOVdeg	CmR	This study
pBbE5k-PEL222-CpFatB1*-LOVdeg	ColE1	PEL222- CpFatB1.2-M4-287-LOVdeg	KanR	This study
