# Supplementary material for: Light-inducible protein degradation in E. coli with the LOVdeg tag
Source: eLife. 2024 Jan 25;12:RP87303. doi: 10.7554/eLife.87303 (PMC10945698; doi:10.7554/eLife.87303)
Supplement: Supplementary file 2. [file elife-87303-supp2.xlsx]

## Sheet: Sheet1
Strains used in this study
Strain	Relevant genotype	Reference
BW25113 (Wild type)	F- Δ(araD-araB)567 ΔlacZ4787(::rrnB-3) λ- rph-1 Δ(rhaD-rhaB)568 hsdR514	(Baba et al., 2006)
ΔlacI	E. coli BW25113 ΔlacI, cured from Keio collection	(Baba et al., 2006)
ΔacrB	E. coli BW25113 ΔacrB, cured from Keio collection	(Baba et al., 2006)
ΔclpX	E. coli BW25113 ΔclpX, cured from Keio collection	(Baba et al., 2006)
ΔhslU	E. coli BW25113 ΔHslU, cured from Keio collection	(Baba et al., 2006)
ΔclpA	E. coli BW25113 ΔclpA, cured from Keio collection	(Baba et al., 2006)
Δlon	E. coli BW25113 Δlon, cured from Keio collection	(Baba et al., 2006)
ΔclpS	E. coli BW25113 ΔclpS, cured from Keio collection	(Baba et al., 2006)
ΔclpP	E. coli BW25113 ΔclpP, cured from Keio collection	(Baba et al., 2006)
ΔacrB + AcrAB	ΔacrB, pBbA5k-acrAB	(El Meouche and Dunlop, 2018)
ΔacrB + AcrAB-LOVdeg	ΔacrB, pBbA5k-acrAB-LOVdeg	This study
LacI-LOVdeg	ΔlacI, pBbS5c-LacI-LOVdeg-mCherry	This study
LacI-LOVdeg + decoy	ΔlacI, pBbS5c-LacI-LOVdeg-mCherry	This study
Dong et al. CRISPRa	BW25113, pJF093, pJF076Sk, pCD061-J106	(Dong et al., 2018)
Ptrc-inducible CRISPRa	BW25113, pA1c-CRISPRa, pJF076Sk, pCD061-J106	This study
LOVdeg CRISPRa	BW25113, pA1c-CRISPRa-LOVdeg, pJF076Sk, pCD061-J106	This study
LOVdeg only (PEL222)	BW25113, pBbE5k-PEL222-mCherry-LOVdeg	This study
LOVdeg + EL222	BW25113, pBbE5k-PEL222-mCherry-LOVdeg, pEL222	This study
CpFatB1*-LOVdeg	BW25113, pBbS5c-CpFatB1*-LOVdeg	This study
CpFatB1*-LOVdeg + EL222	BW25113, pBbE5k-PEL222-CpFatB1*-LOVdeg, pEL222	This study
CpFatB1* EL222	BW25113, pBbE5k-PEL222-CpFatB1*-LOVdeg	This study
