# Supplementary material for: Light-inducible protein degradation in E. coli with the LOVdeg tag
Source: eLife. 2024 Jan 25;12:RP87303. doi: 10.7554/eLife.87303 (PMC10945698; doi:10.7554/eLife.87303)
Supplement: Supplementary file 3. [file elife-87303-supp3.xlsx]

## Sheet: Sheet1
DNA sequences used in this study
Gene	Sequence
AsLOV2(546)	ttggctactacacttgaacgtattgagaagaactttgtcattactgacccaagattgccagataatcccattatattcgcgtccgatagtttcttgcagttgacagaatatagccgtgaagaaattttgggaagaaacTGCaggtttctacaaggtcctgaaactgatcgcgcgacagtgagaaaaattagagatgccatagataaccaaacagaggtcactgttcagctgattaattatacaaagagtggtaaaaagttctggaacctctttcacttgcagcctatgcgagatcagaagggagatgtccagtactttattggggttcagttggatggaactgagcatgtccgagatgctgccgagagagagggagtcatgctgattaagaaaactgca…
AsLOV2(543)	ttggctactacacttgaacgtattgagaagaactttgtcattactgacccaagattgccagataatcccattatattcgcgtccgatagtttcttgcagttgacagaatatagccgtgaagaaattttgggaagaaacTGCaggtttctacaaggtcctgaaactgatcgcgcgacagtgagaaaaattagagatgccatagataaccaaacagaggtcactgttcagctgattaattatacaaagagtggtaaaaagttctggaacctctttcacttgcagcctatgcgagatcagaagggagatgtccagtactttattggggttcagttggatggaactgagcatgtccgagatgctgccgagagagagggagtcatgctgattaagaaaactgca…
AsLOV2*(546)	ttggctactacacttgaacgtattgagaagaactttgtcattactgacccaagattgccagataatcccattatattcgcgtccgatagtttcttgcagttgacagaatatagccgtgaagaaattttgggaagaaactgtcgcttcttacaaggcccggaaaccgatcgcgcaaccgtccgtaagattcgcgacgccatcgataatcaaaccgaggttacggtgcaattaattaactacacgaaatccggtaagaagttttggaatgtatttcatttgcaacccatgcgtgaccagaaaggagatgtacaatatttcatcggagttcaactcgacggtacggagcgccttcgcggggcagcggaacgcgaagccgttatgttgattaagaaaaccgcg…
AsLOV2*(543) LOVdeg	ttggctactacacttgaacgtattgagaagaactttgtcattactgacccaagattgccagataatcccattatattcgcgtccgatagtttcttgcagttgacagaatatagccgtgaagaaattttgggaagaaactgtcgcttcttacaaggcccggaaaccgatcgcgcaaccgtccgtaagattcgcgacgccatcgataatcaaaccgaggttacggtgcaattaattaactacacgaaatccggtaagaagttttggaatgtatttcatttgcaacccatgcgtgaccagaaaggagatgtacaatatttcatcggagttcaactcgacggtacggagcgccttcgcggggcagcggaacgcgaagccgttatgttgattaagaaaaccgcg…
